# Supplementary material for: Chronic Ethanol Causes Persistent Increases in Alzheimer’s Tau Pathology in Female 3xTg-AD Mice: A Potential Role for Lysosomal Impairment
Source: PubMed Central journal article supplement (PMC9131098; doi:10.3389/fnbeh.2022.886634), 2022-05-11

# Full Length Western Blots

Tucker et al 2022

# Figure 3A: Total Tau in female cortex

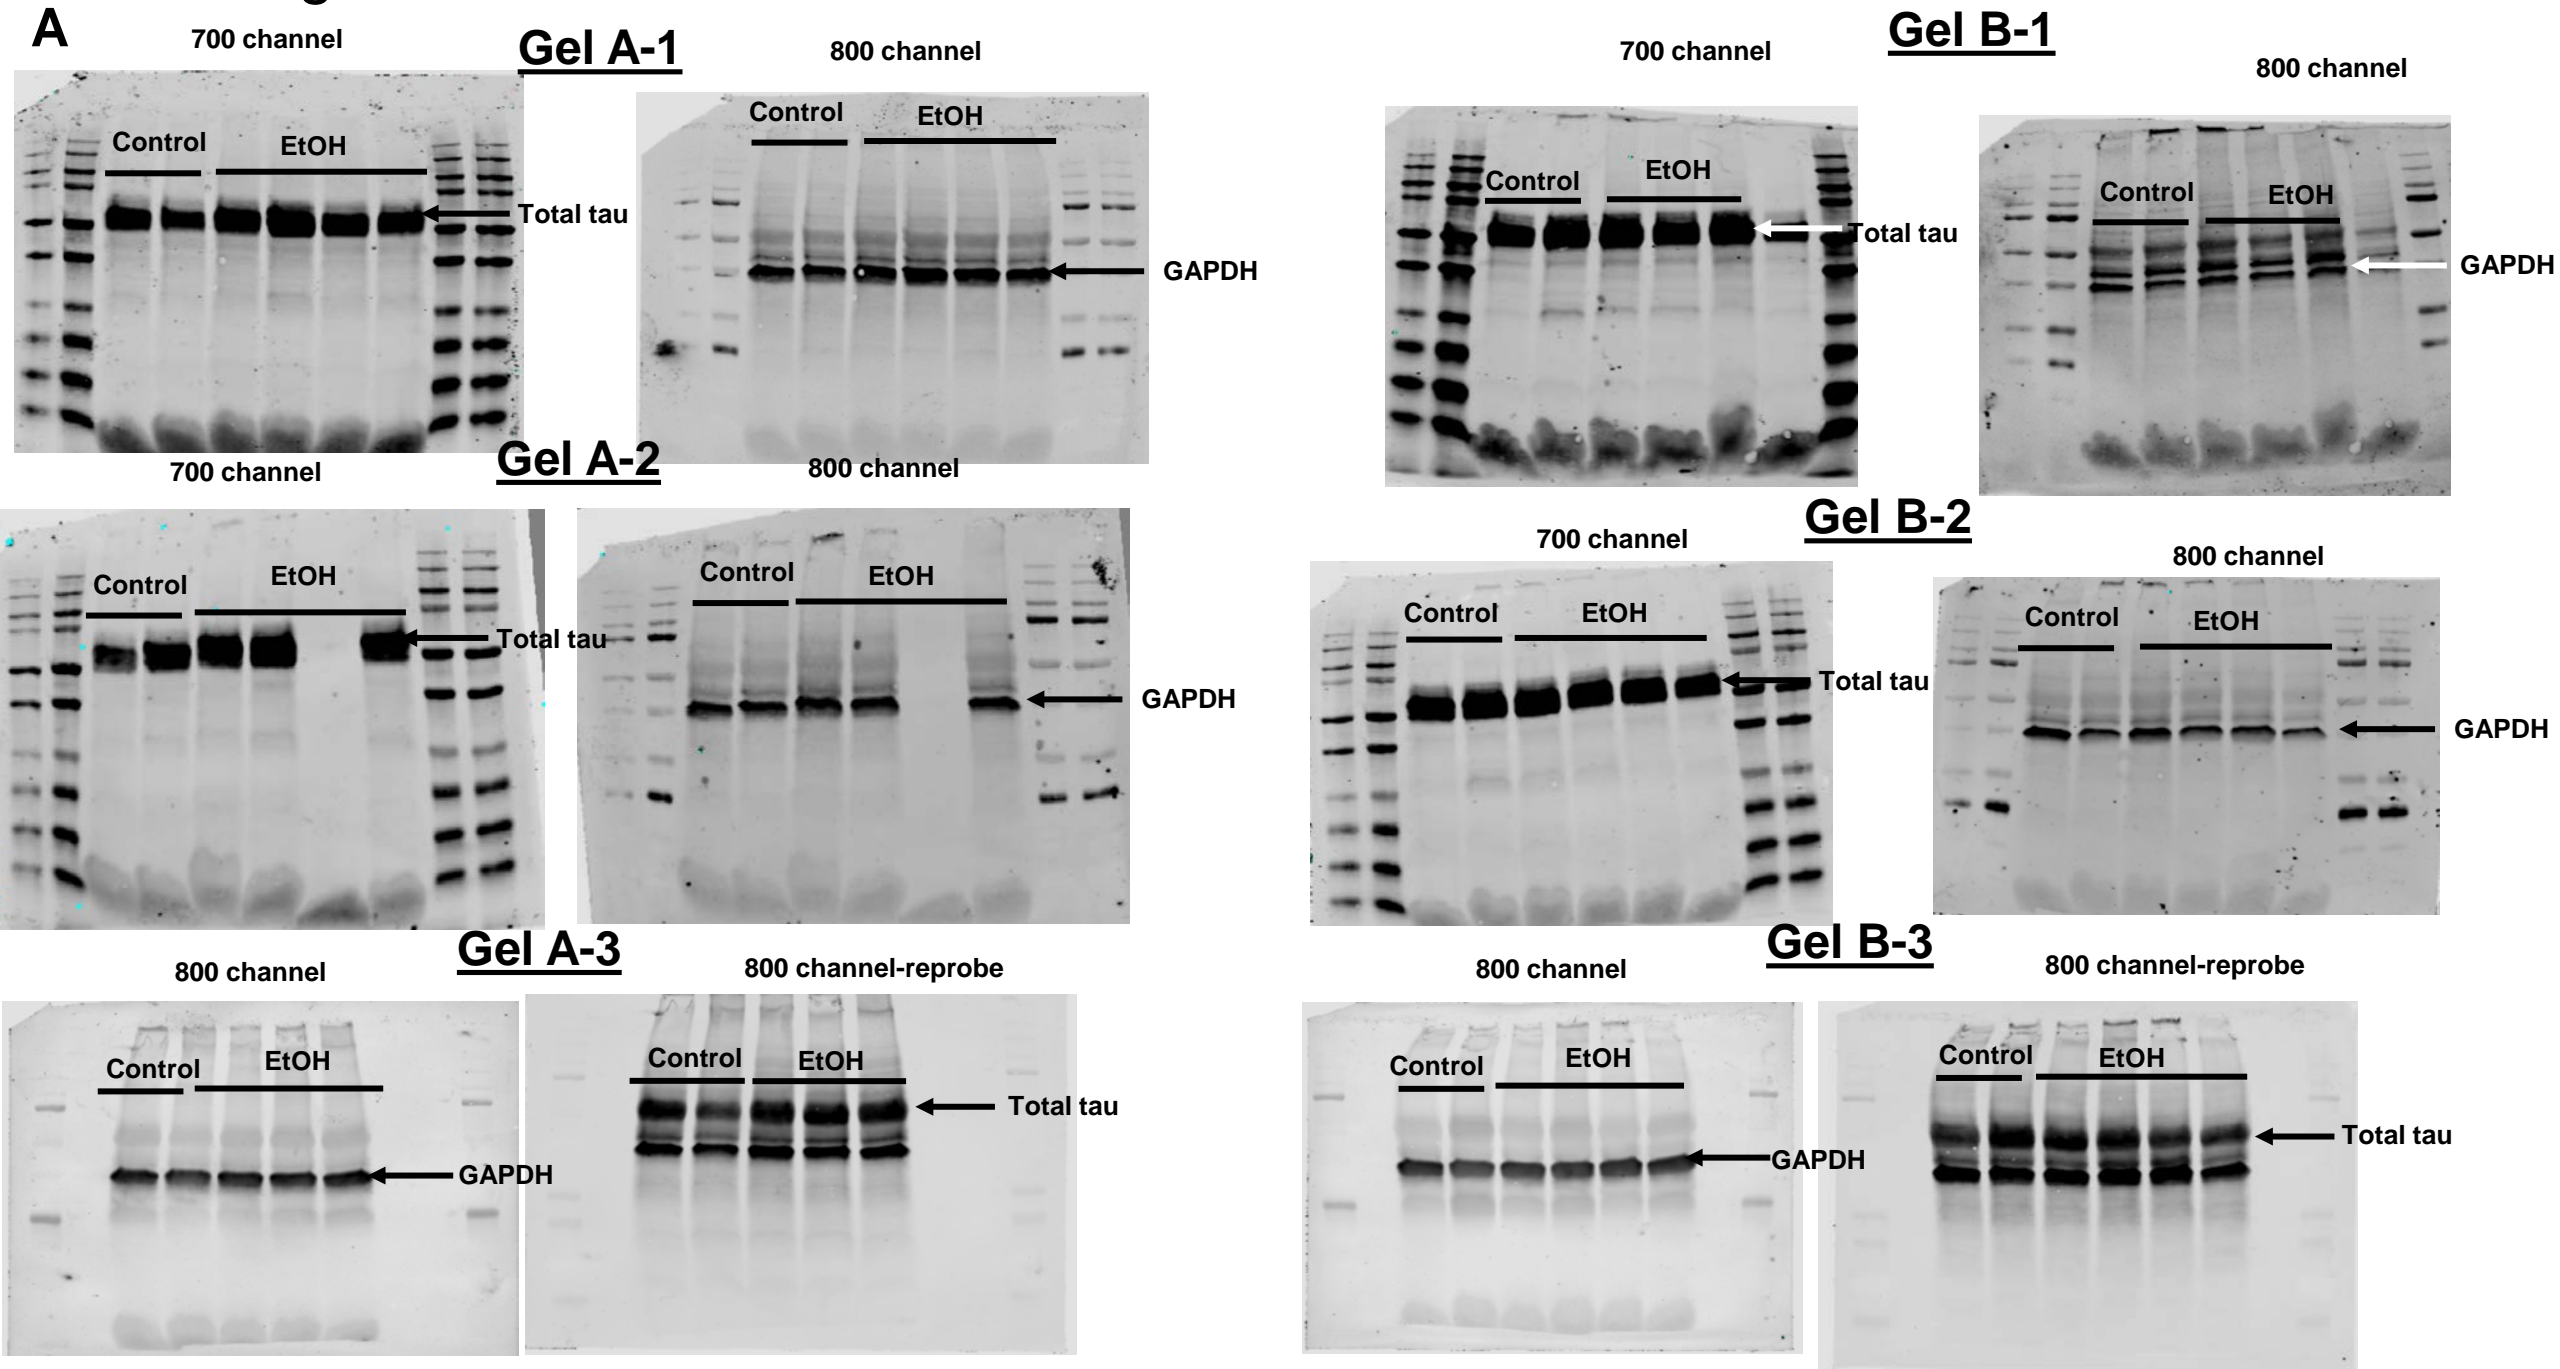

Figure 3B: p-tau214 in female cortex

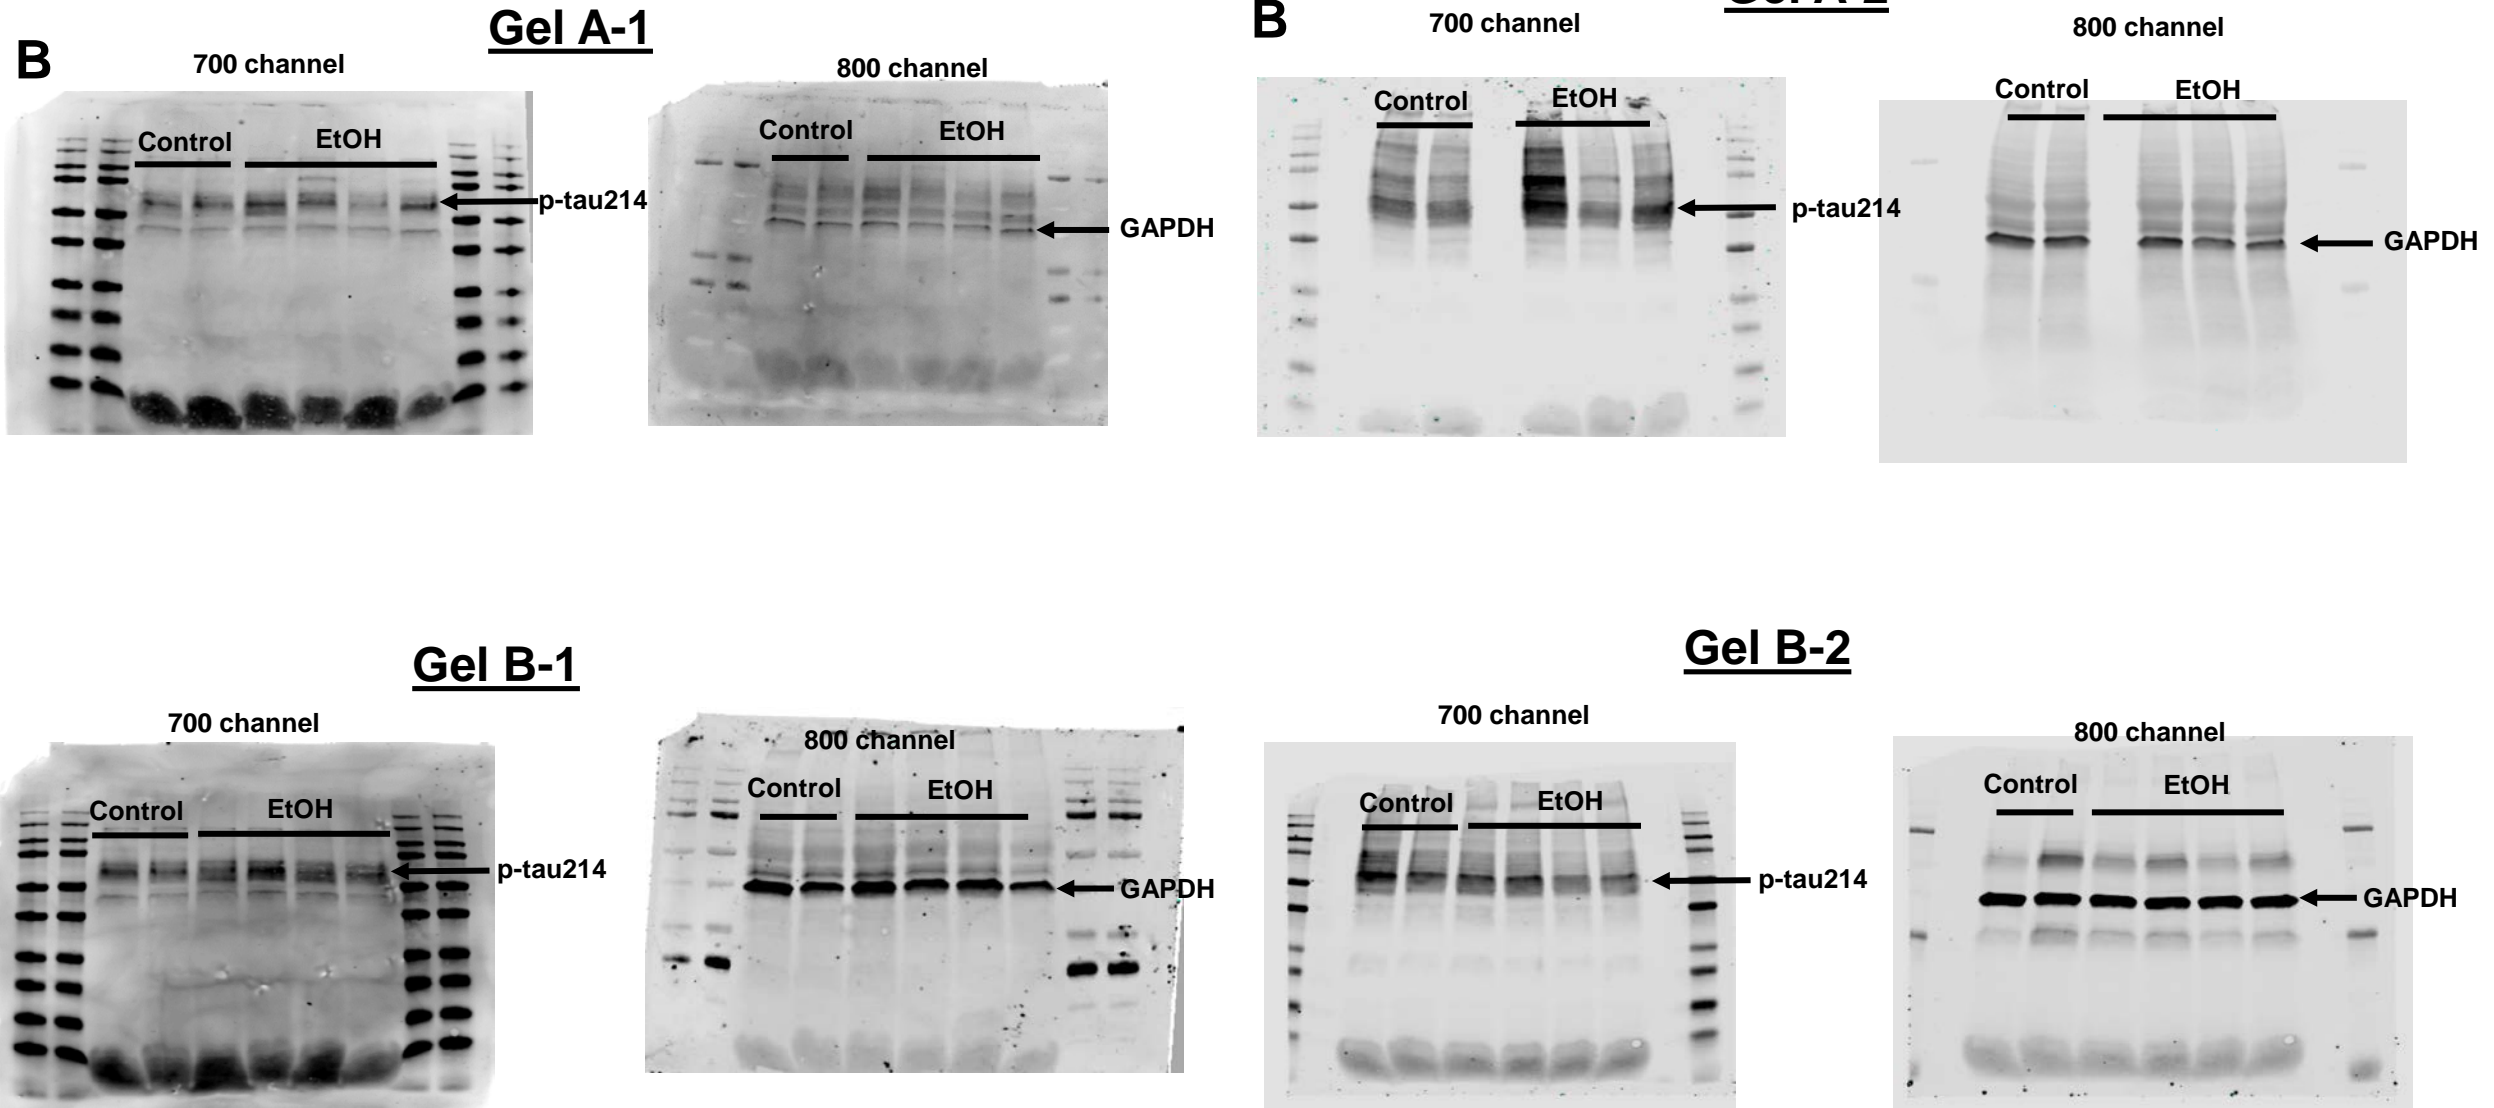

Figure 3C: Total Tau in female Hippocampus

C

Gel A-1

800 channel

Control

EtOH

800 channel-reprobe

Control

EtOH

GAPDH

Total tau

Gel A-2

800 channel

Control

EtOH

GAPDH

Total Tau

Gel B-1

800 channel

Control

EtOH

GAPDH

800 channel-reprobe

Control

EtOH

Total tau

Gel B-2

700 channel

Control

EtOH

Total tau

800 channel

Control

EtOH

GAPDH

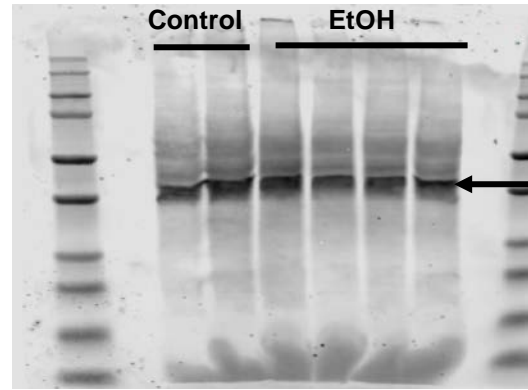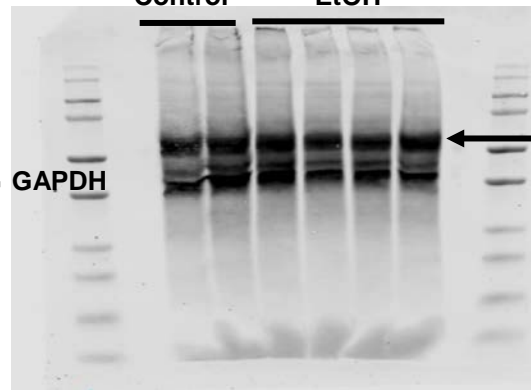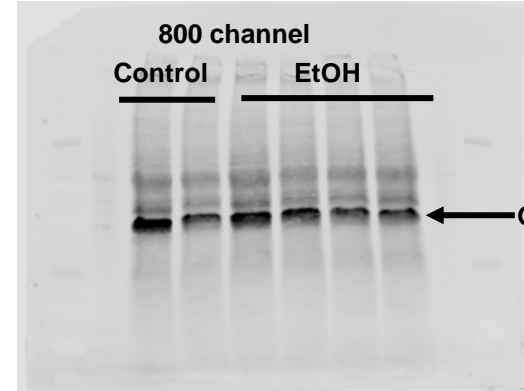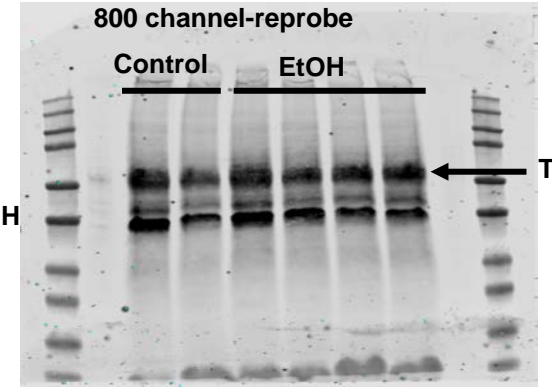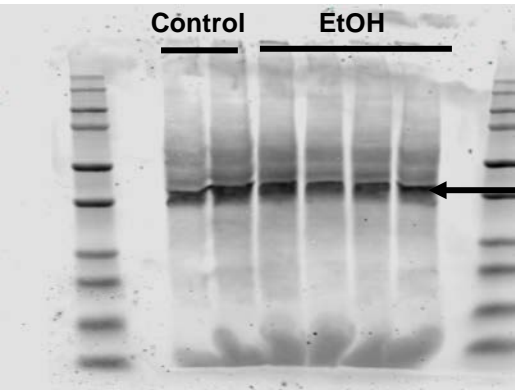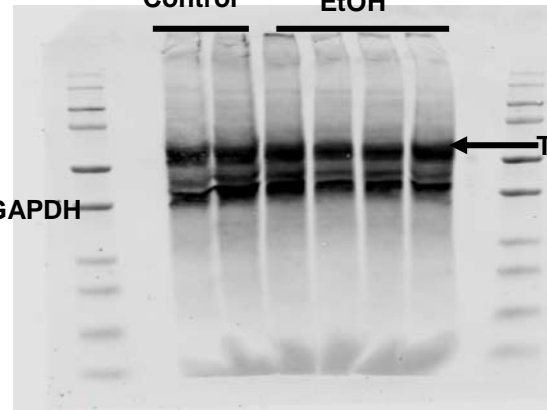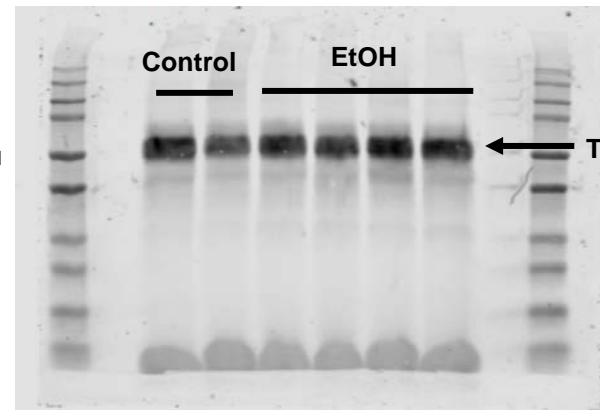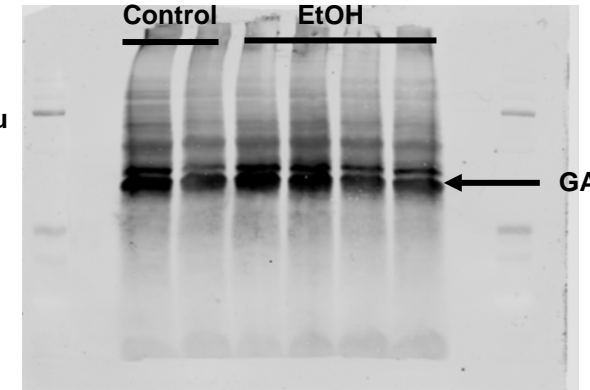

Figure 3D-E: pTau214 in female hippocampus and amyloid in female cortex

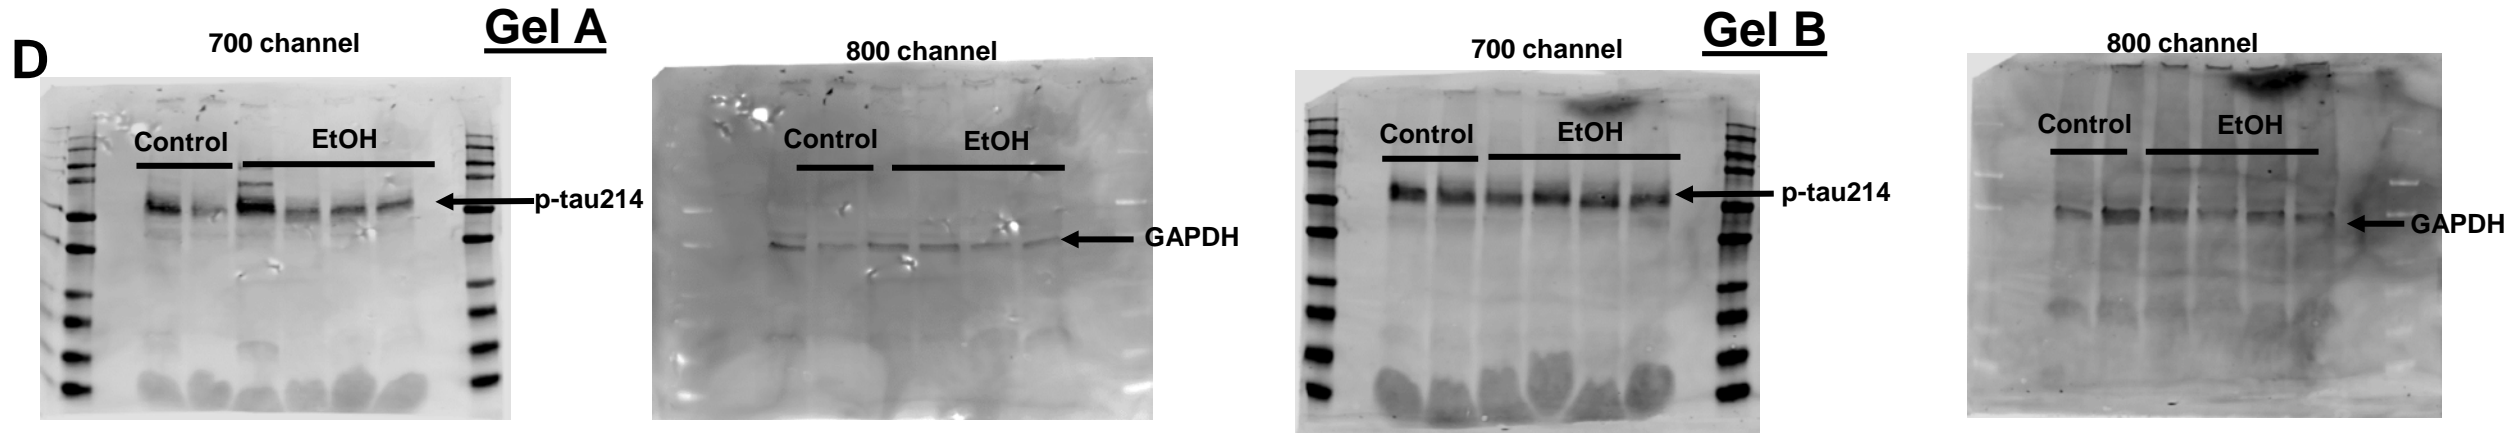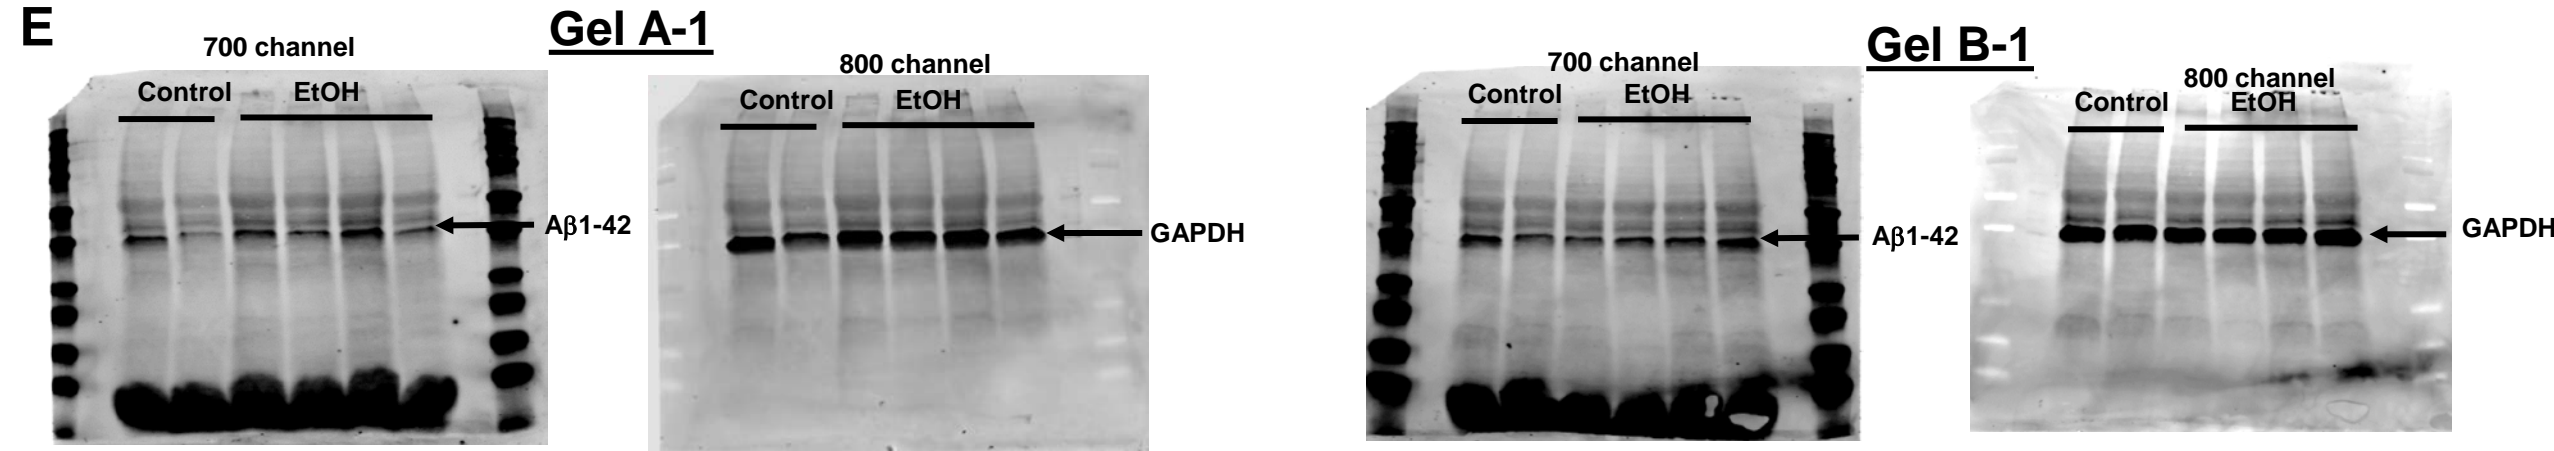

Figure 3F: A $\beta$ 1-42 in female Hippocampus

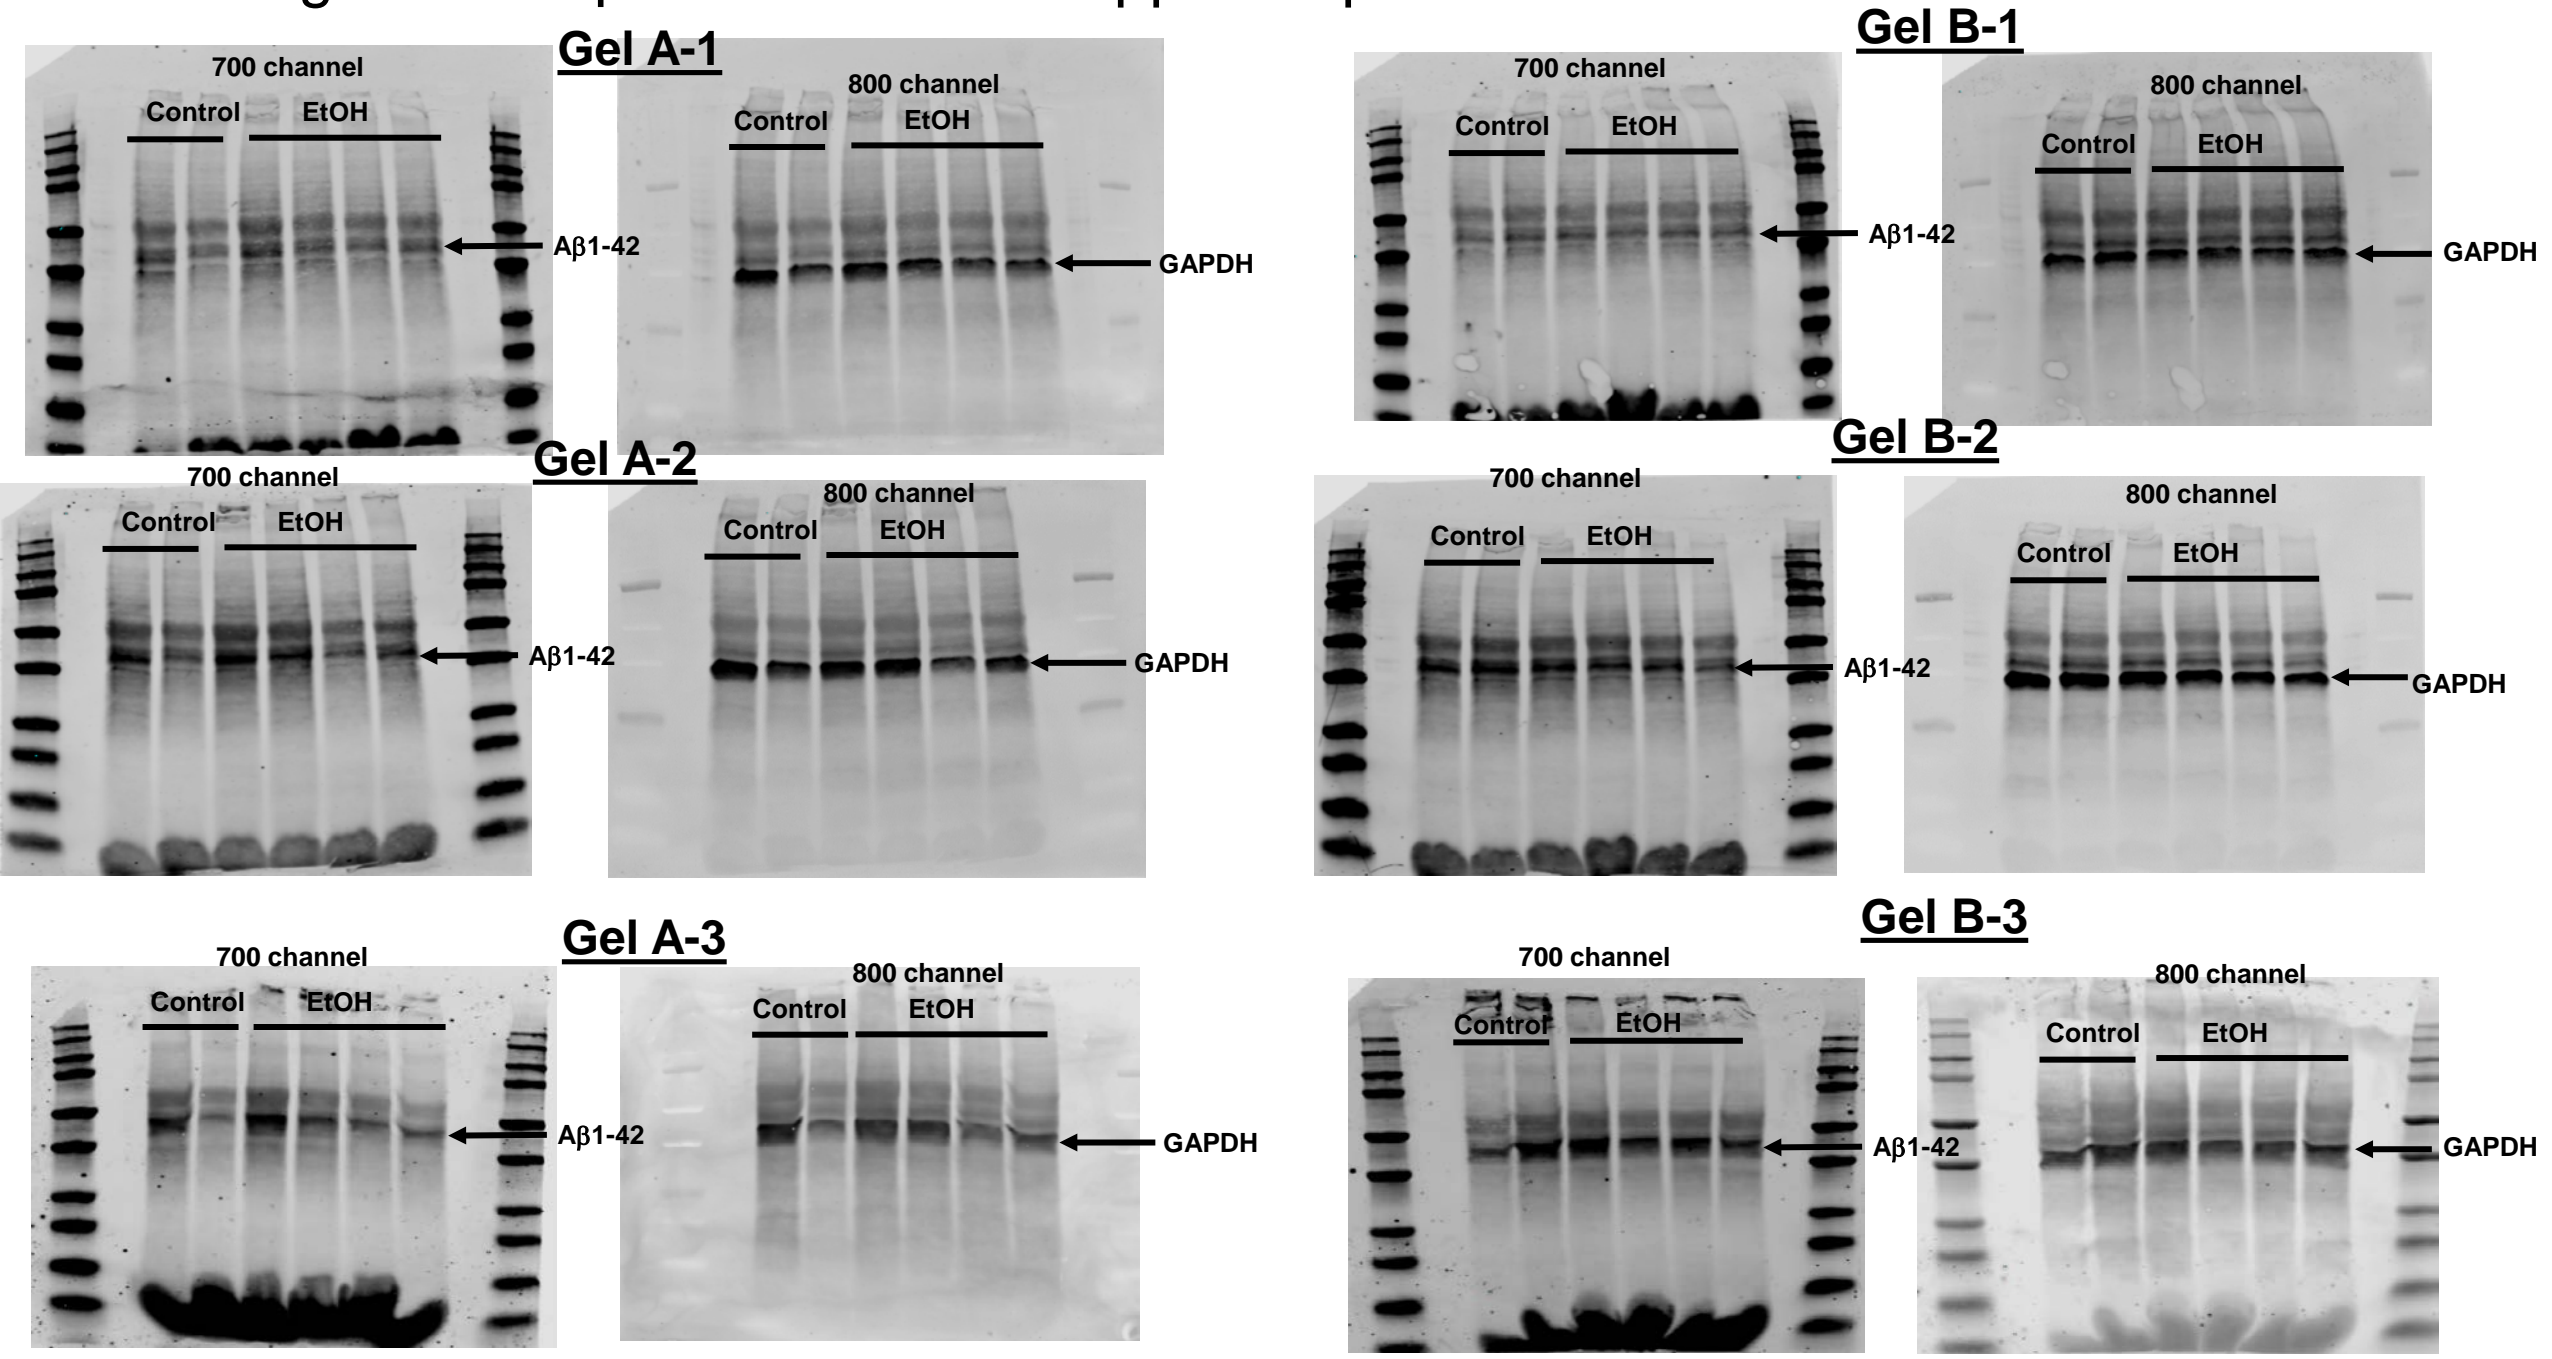

# Figure 4A,B,E: Tau and amyloid in male cortex

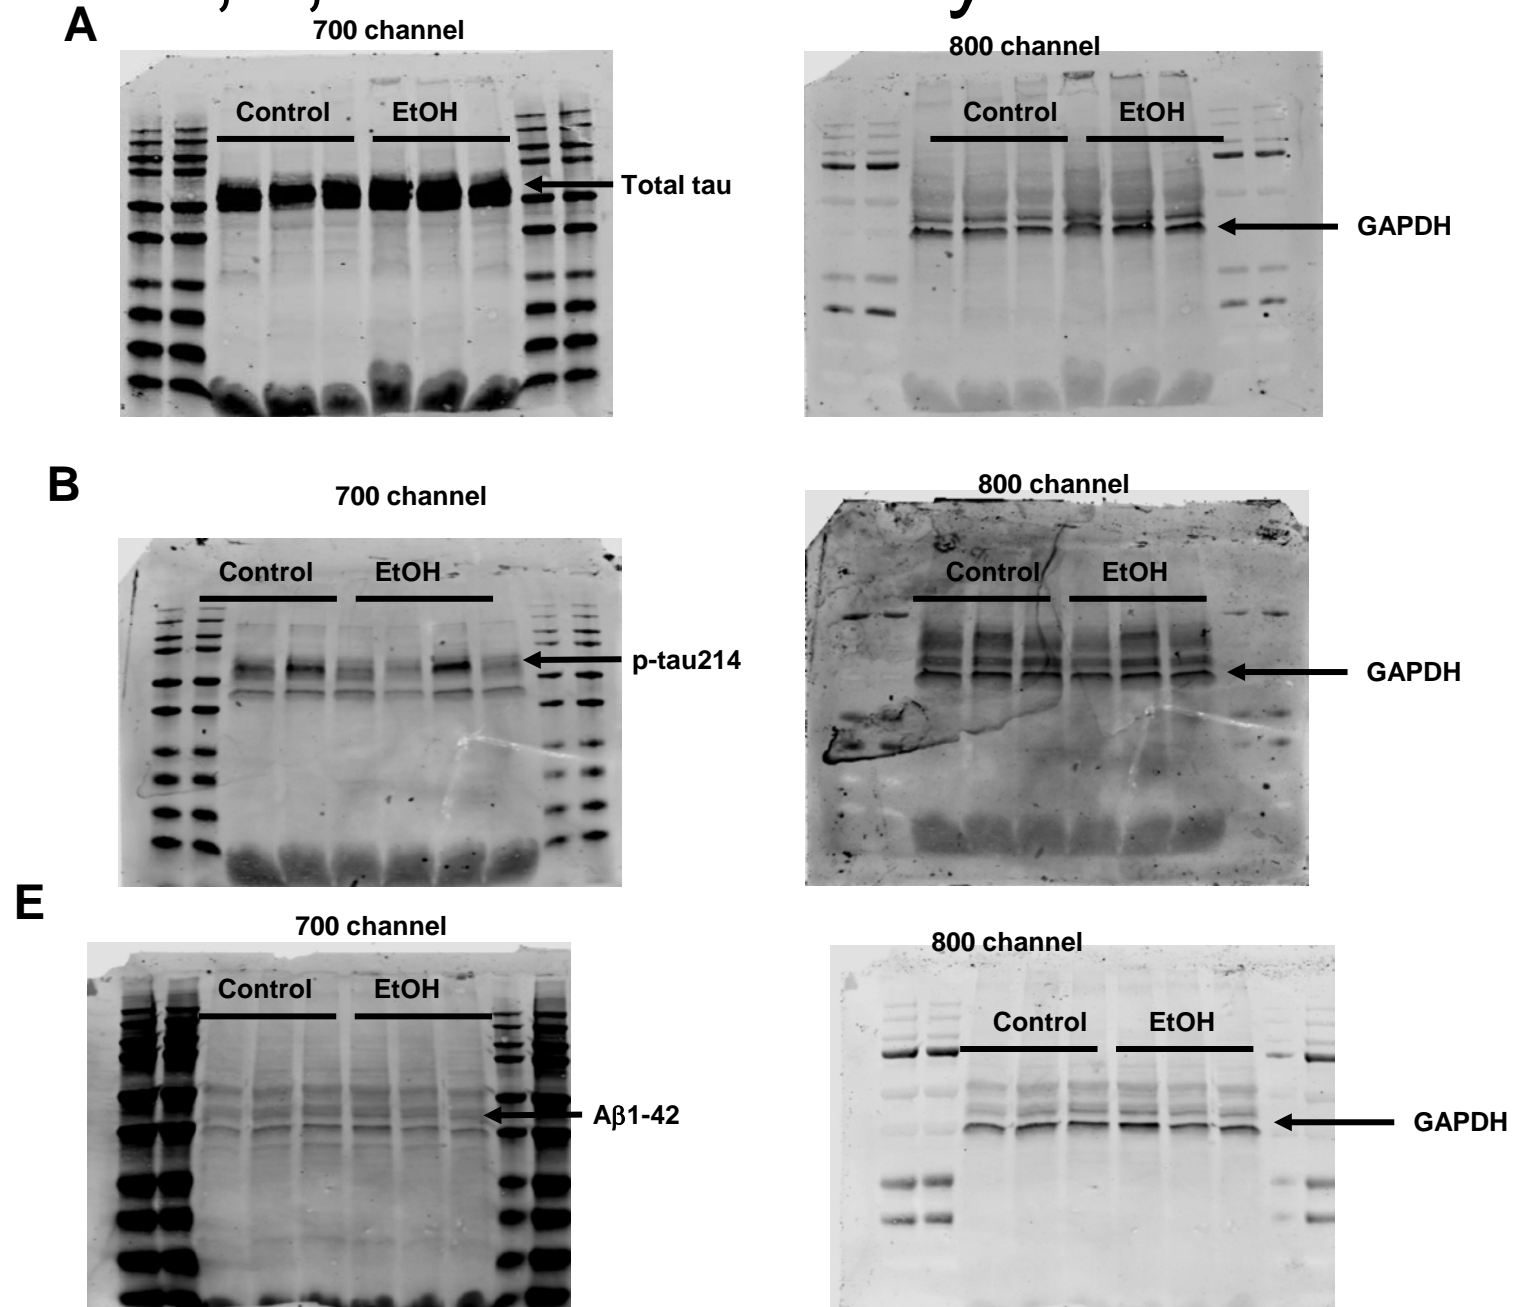

# Figure 4C-D: Total Tau and pTau 214 in male hippocampus

C-1

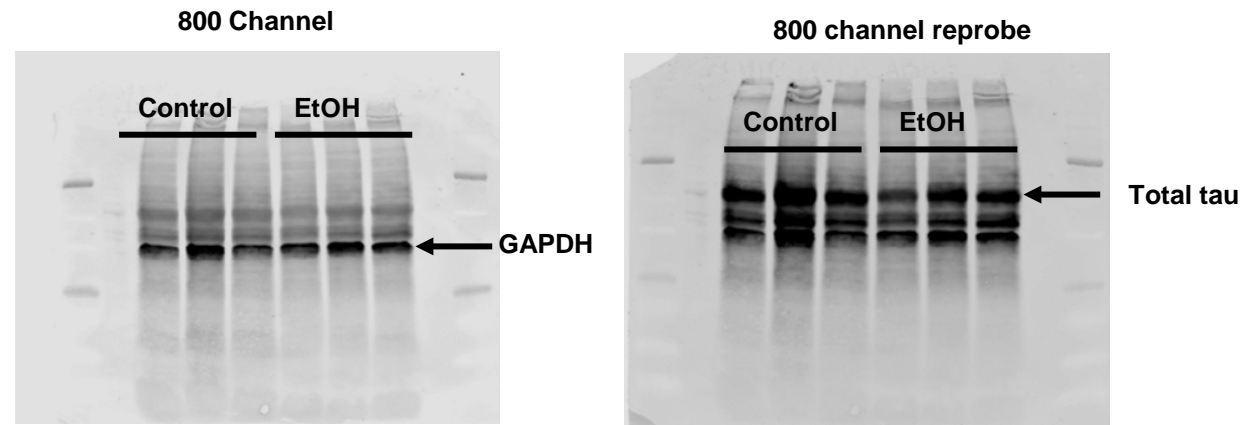

C-2

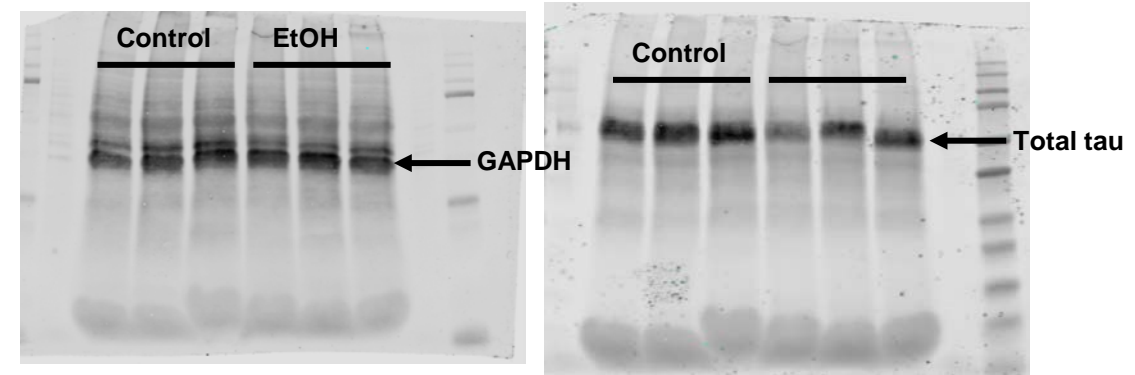

D-1

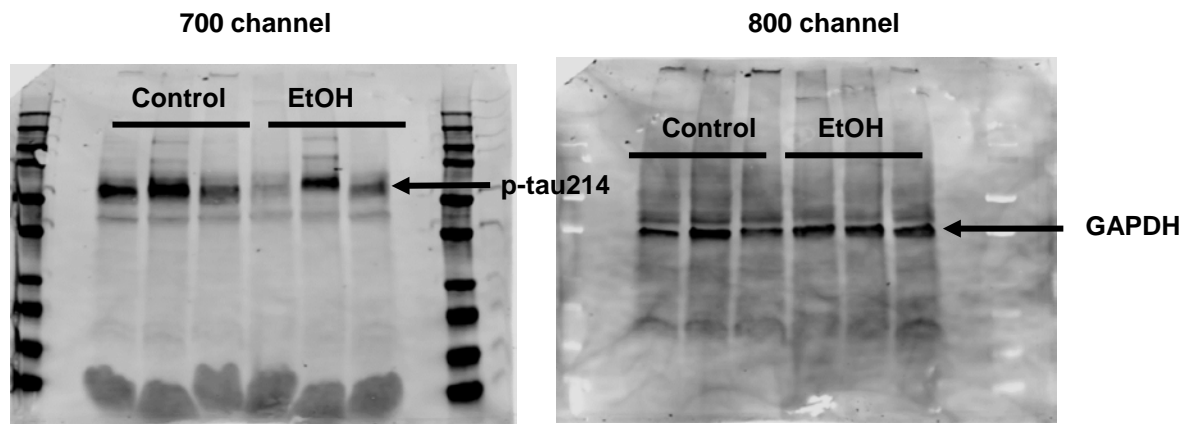

D-2

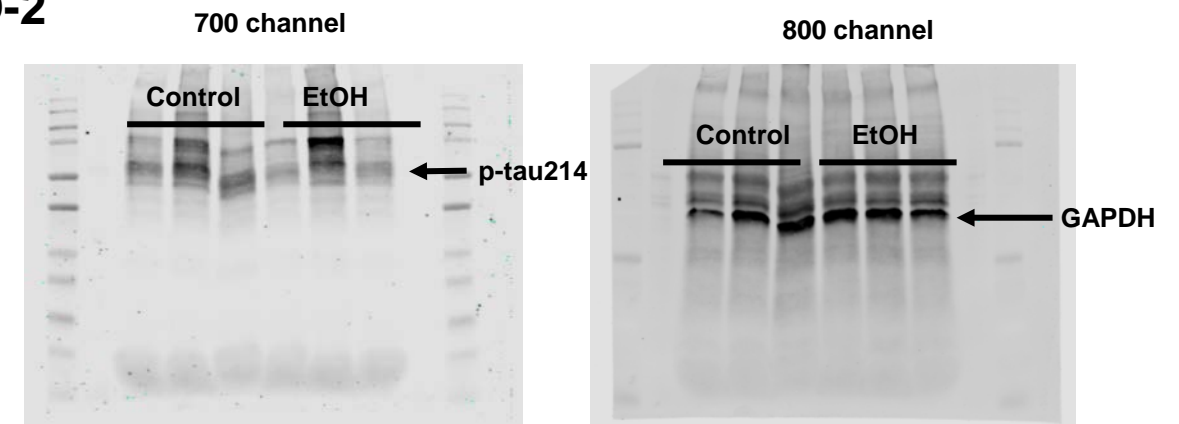



# Figure 4F: A $\beta$ 1-42 in male hippocampus

F

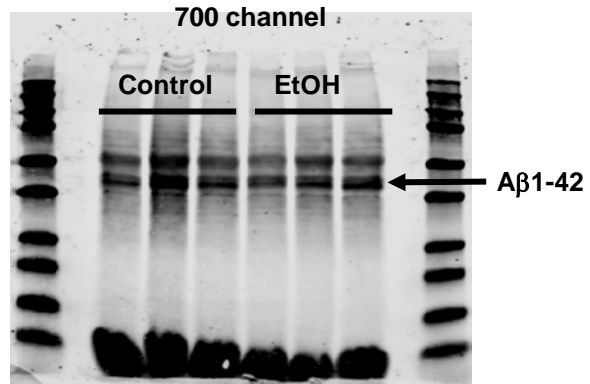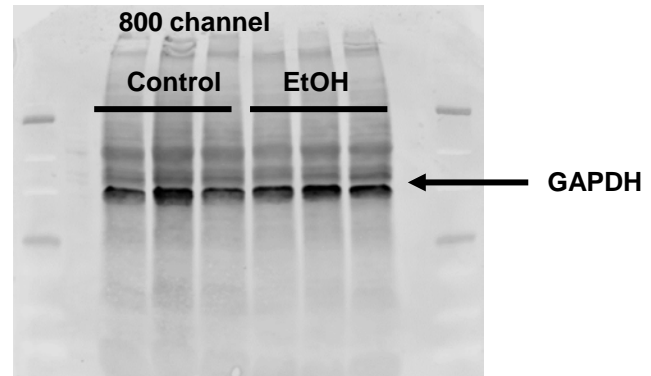

# Figure 6A: Total GSK3 $\beta$ in female cortex

A

## Gel A-cortex

## Gel B-cortex

reprobe

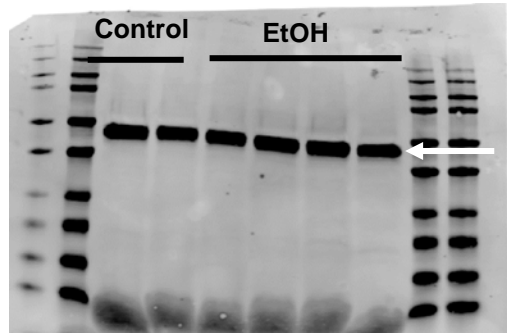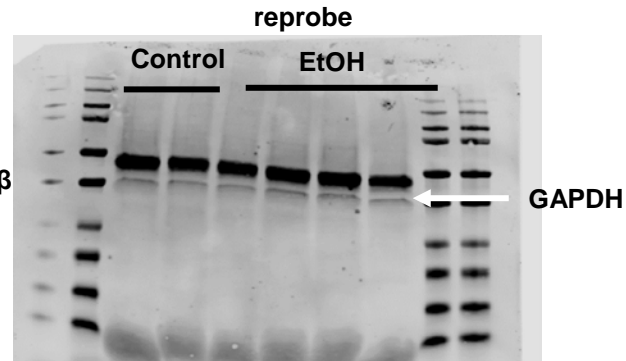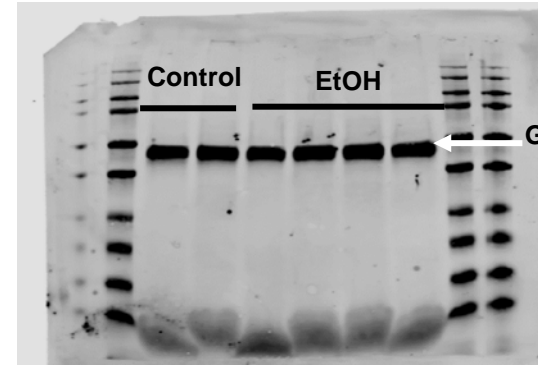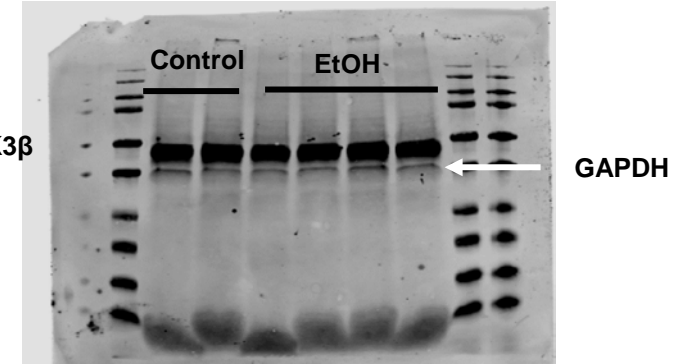

A

## Gel A-hippocampus

## Gel B-hippocampus

700 channel

800 channel

700 channel

800 channel

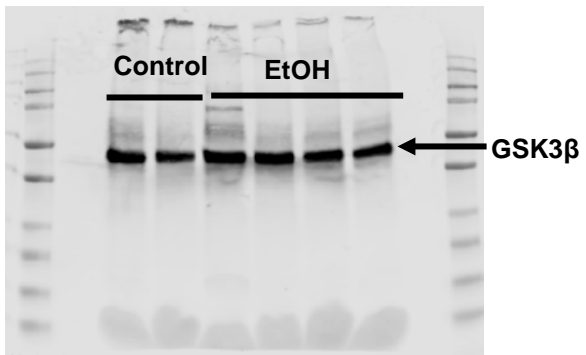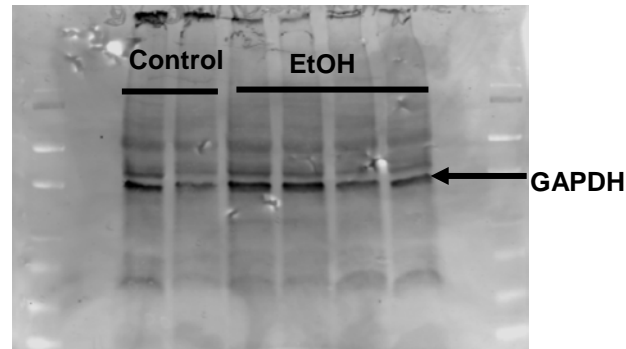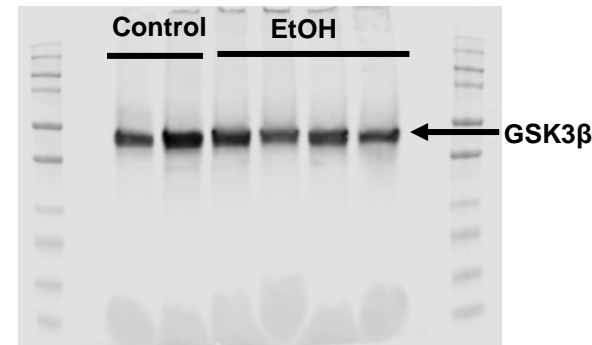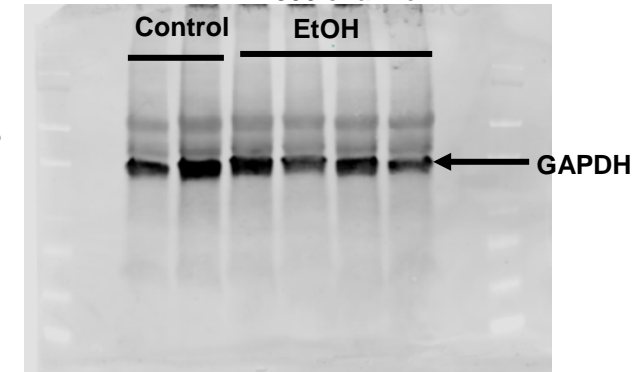

# Figure 6B: GSK3 $\beta$ isoforms in female cortex

**B**

**Gel A**

800 channel

800 reprobe

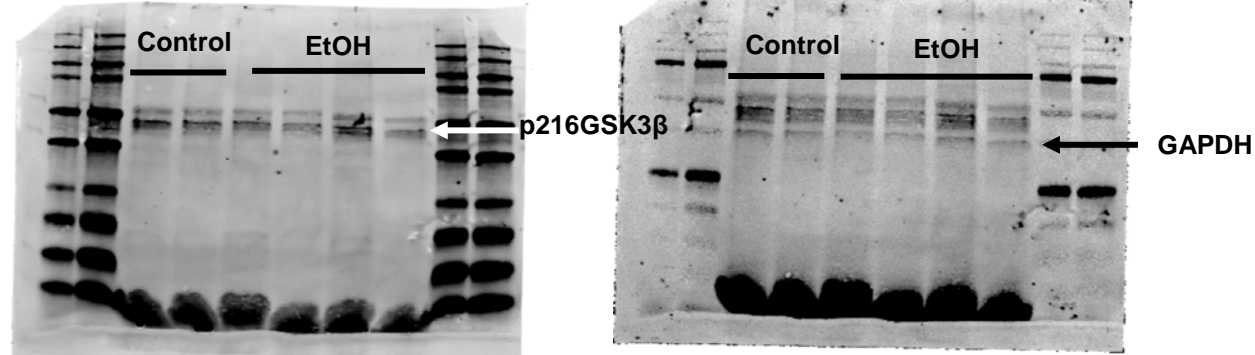

**Gel B**

800 channel

800 reprobe

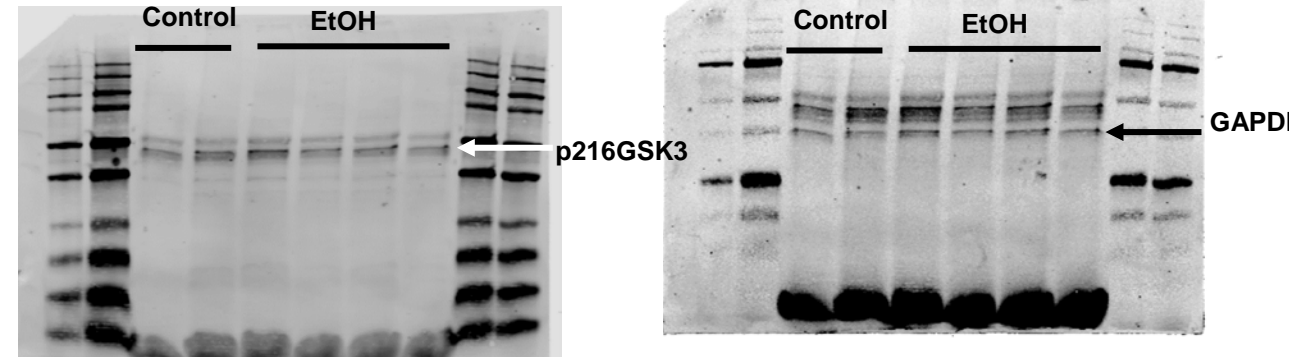

**B**

**Gel A**

700 channel

800 channel

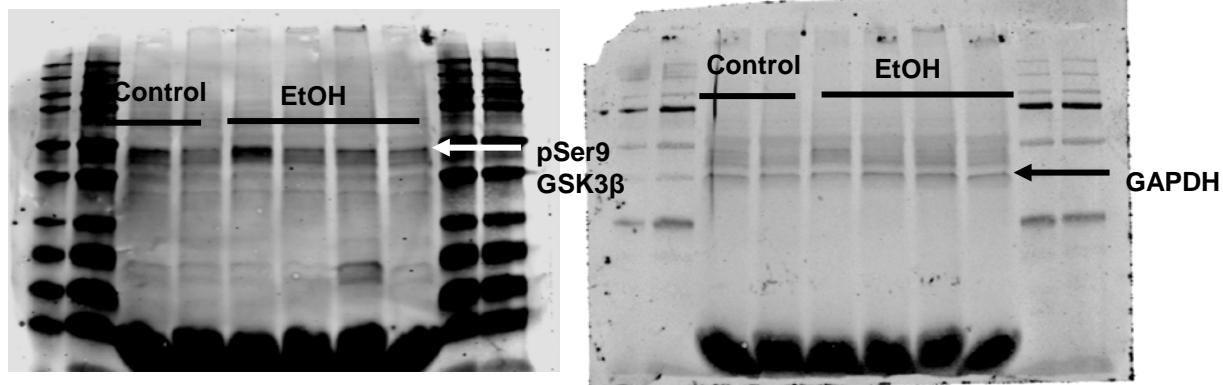

**B**

**Gel B**

700 channel

800 channel

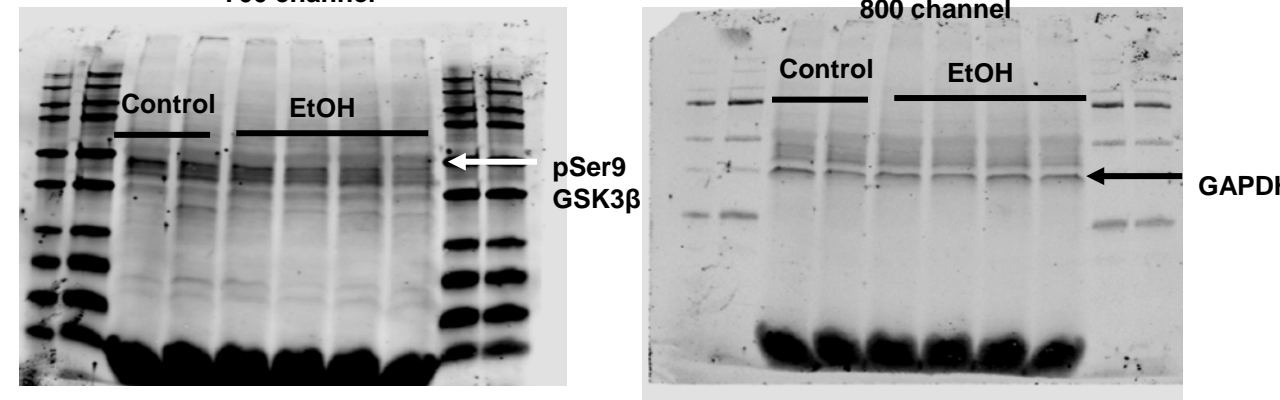

# Figure 6C-D: PKA and PP2A in female cortex

C

Gel A

Gel B

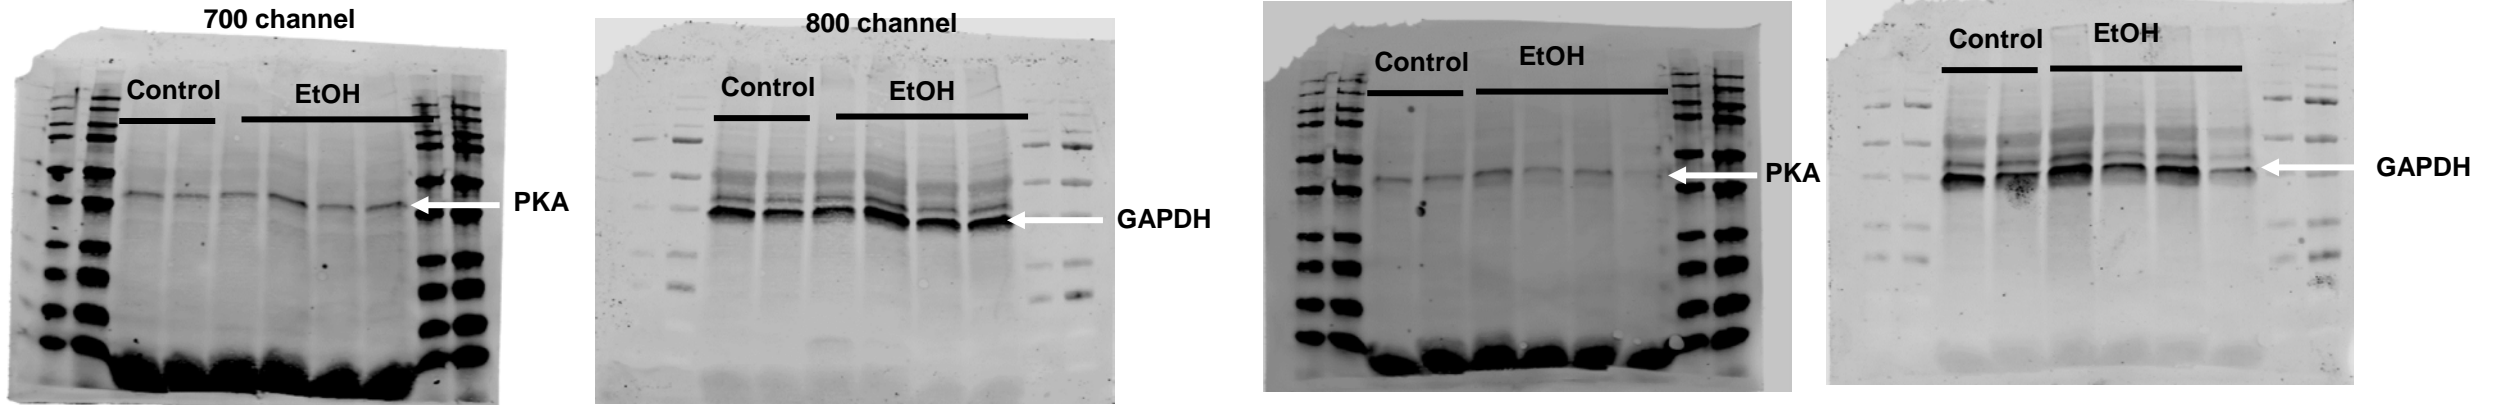

D

Gel A

Gel B

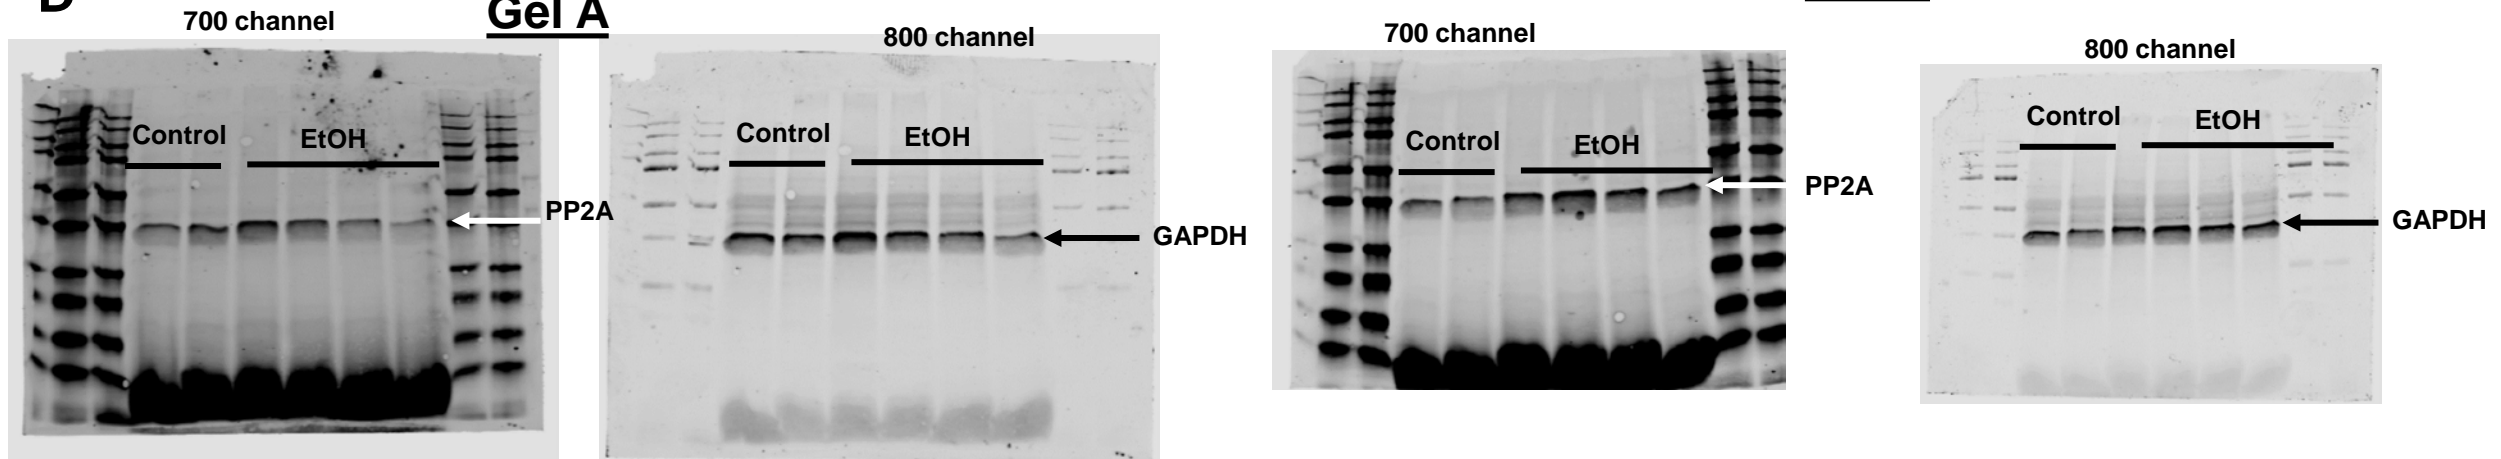

Supplement: Data_Sheet_1.pdf [file Data_Sheet_1.pdf]
